# Supplementary material for: Neutrophil-to-Lymphocyte Ratio Is a Predictive Biomarker in Patients with Epidermal Growth Factor Receptor (EGFR) Mutated Advanced Non-Small Cell Lung Cancer (NSCLC) Treated with Tyrosine Kinase Inhibitor (TKI) Therapy
Source: PubMed Central journal article supplement (PMC8003851; doi:10.3390/cancers13061426), 2021-03-20
Supplement: cancers-13-01426-s001.pdf [file cancers-13-01426-s001.pdf]

# Supplementary Materials: Neutrophil-to-Lymphocyte Ratio is a Predictive Biomarker in Patients with Epidermal Growth Factor Receptor (EGFR) Mutated Advanced Non-small Cell Lung Cancer (NSCLC) Treated with Tyrosine Kinase Inhibitor (TKI) Therapy

Nicole K. Yun, Sherin J. Rouhani, Christine M. Bestvina, Ethan M. Ritz, Brendan A. Gilmore, Imad Tarhoni, Jeffrey A. Borgia, Marta Batus, Philip D. Bonomi and Mary Jo Fidler

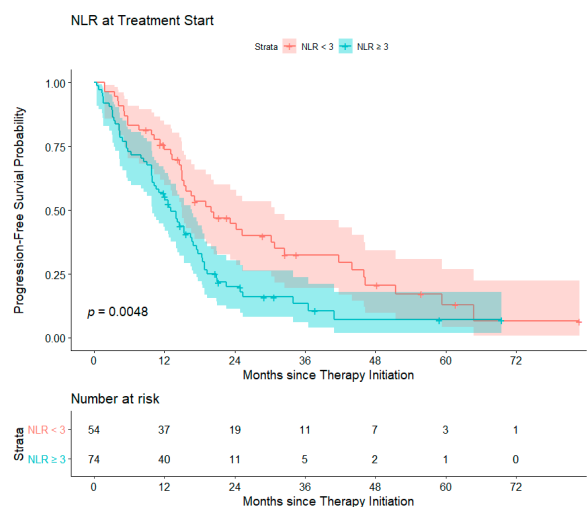

(a)

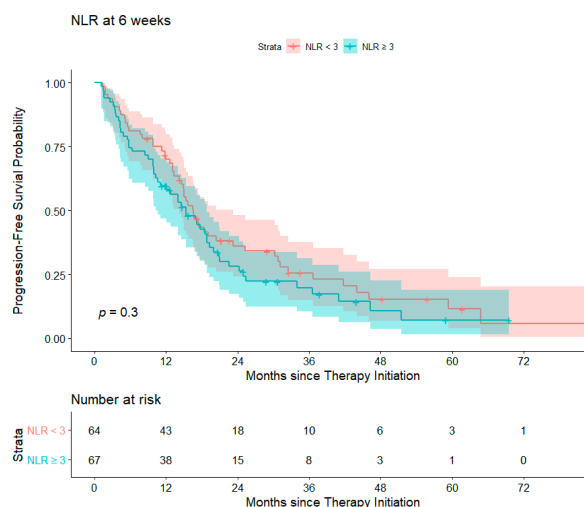

(b)

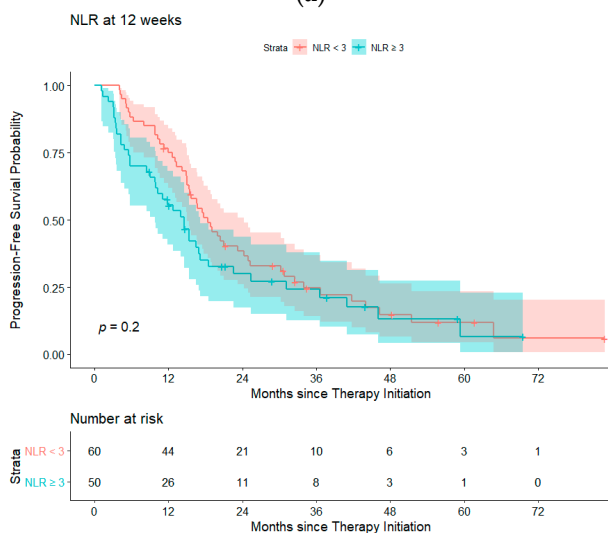

(c)

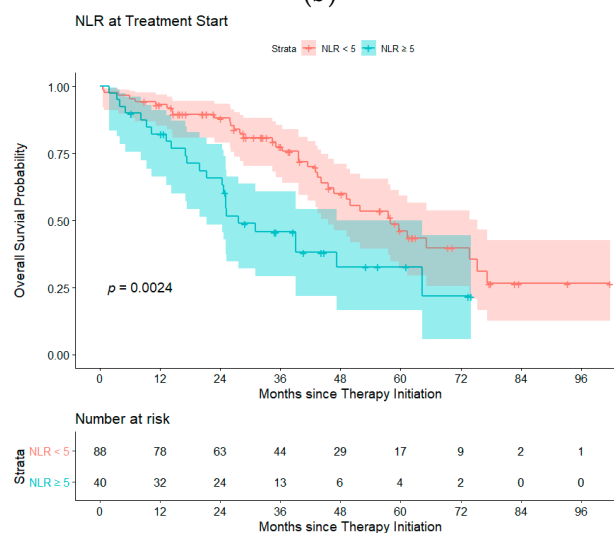

(d)

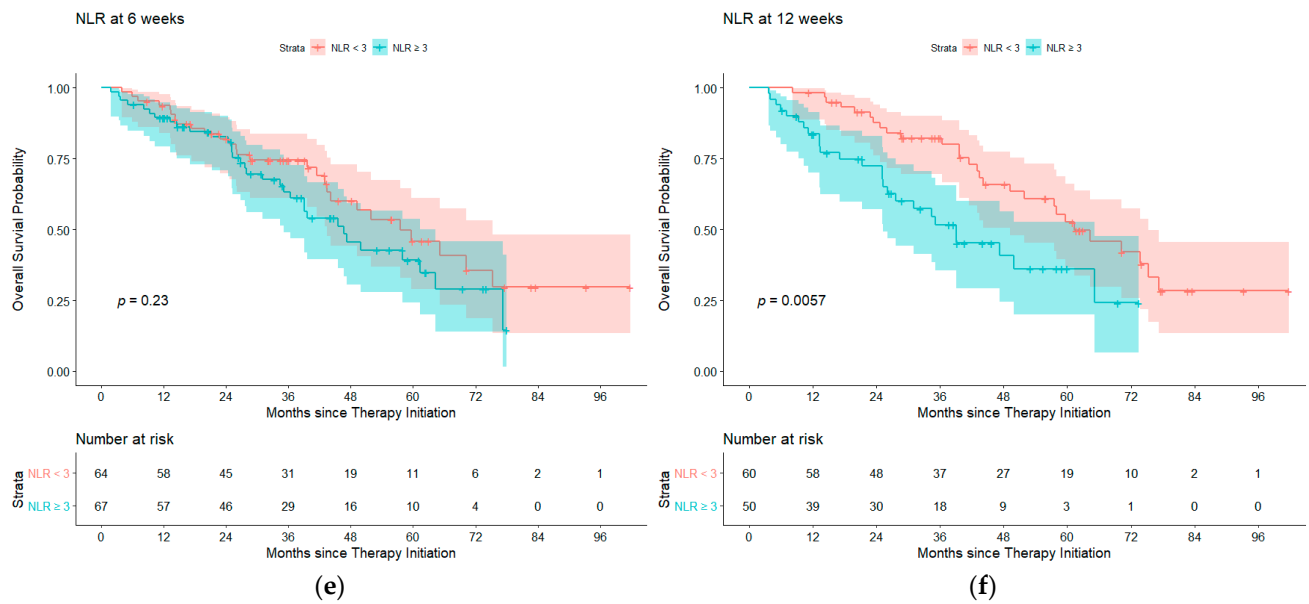

**Figure S1.** Progression free survival probability for NLR < 3 (red) compared to NLR ≥ 3 (blue) at (a) treatment start, (b) 6 weeks of therapy and (c) 12 weeks of therapy. Overall survival probability for NLR < 3 compared to NLR ≥ 3 at (d) treatment start, (e) 6 weeks of therapy and (f) 12 weeks of therapy.

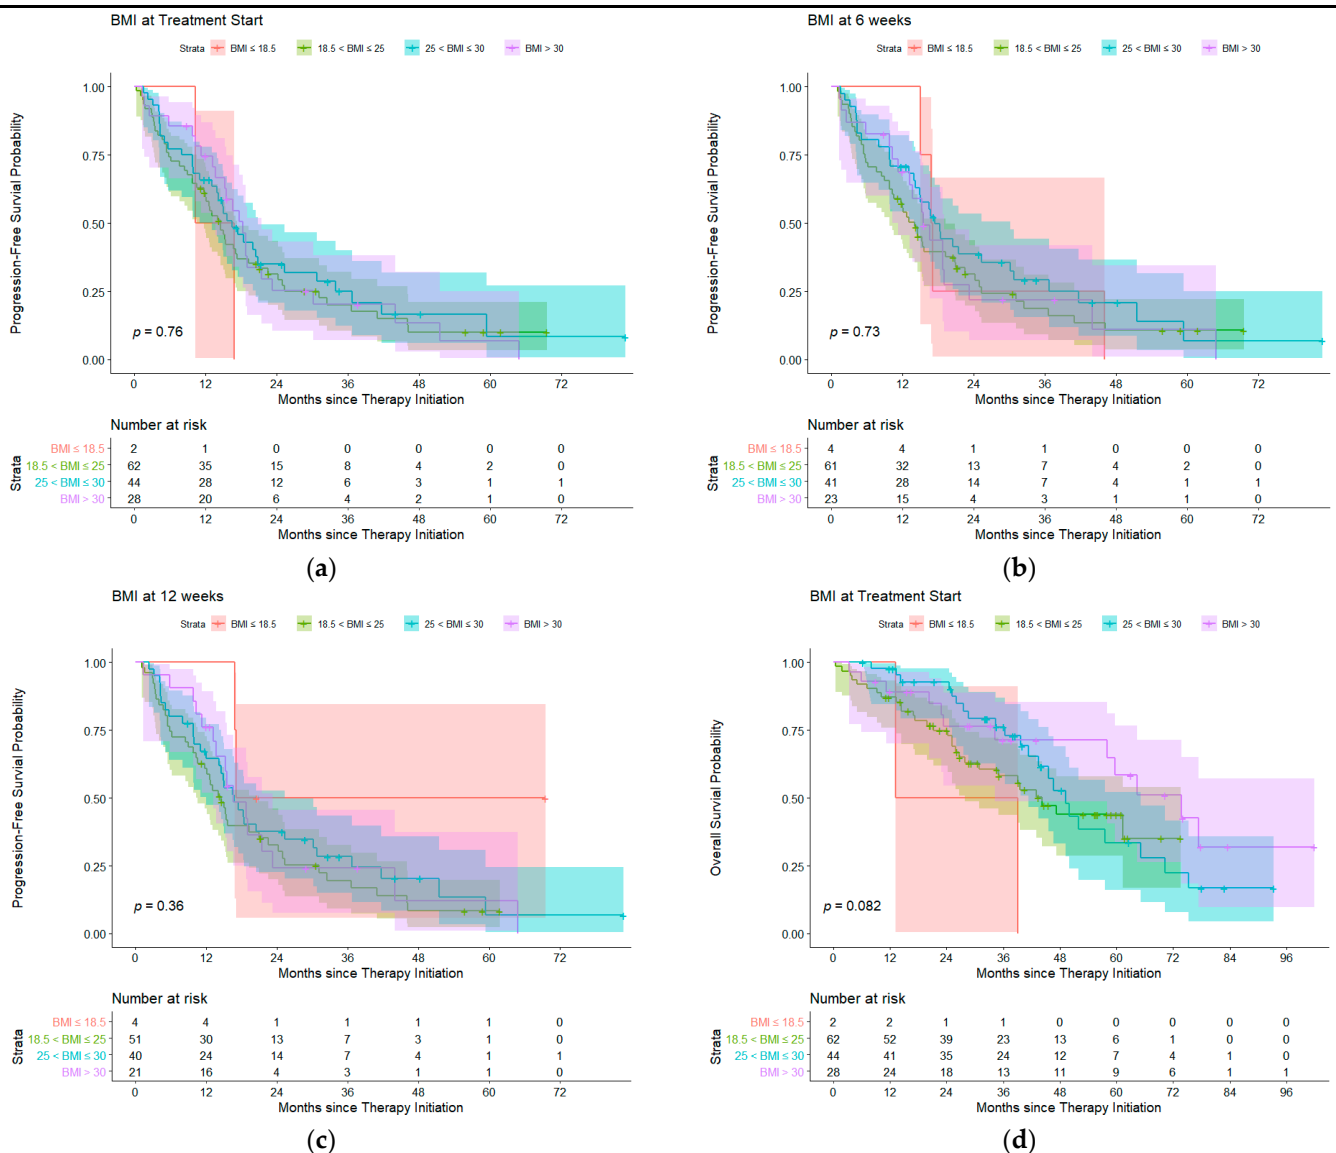

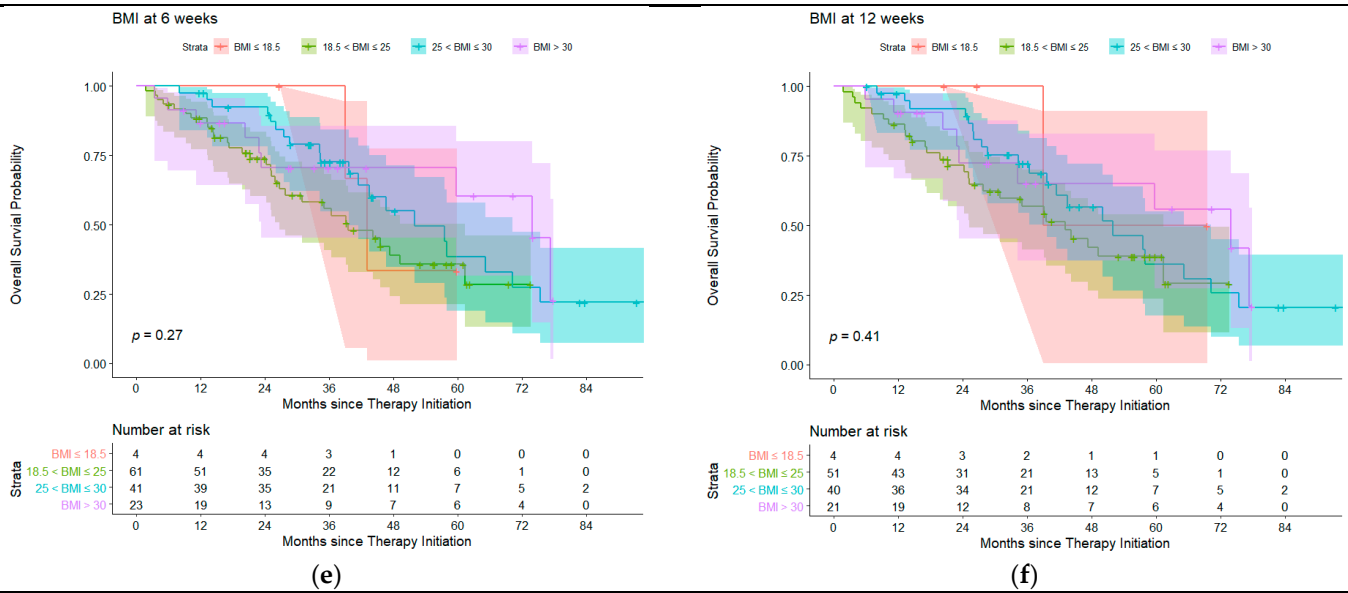

**Figure S2.** Progression free survival probability for BMI ≤ 18.5 (red), > 18.5 to ≤ 25 (green), > 25 to ≤ 30 (blue) and > 30 (purple) at (a) treatment start, (b) 6 weeks of therapy and (c) 12 weeks of therapy. Overall survival probability for BMI ≤ 18.5, > 18.5 to ≤ 25, > 25 to ≤ 30 and > 30 at (d) treatment start, (e) 6 weeks of therapy and (f) 12 weeks of therapy.

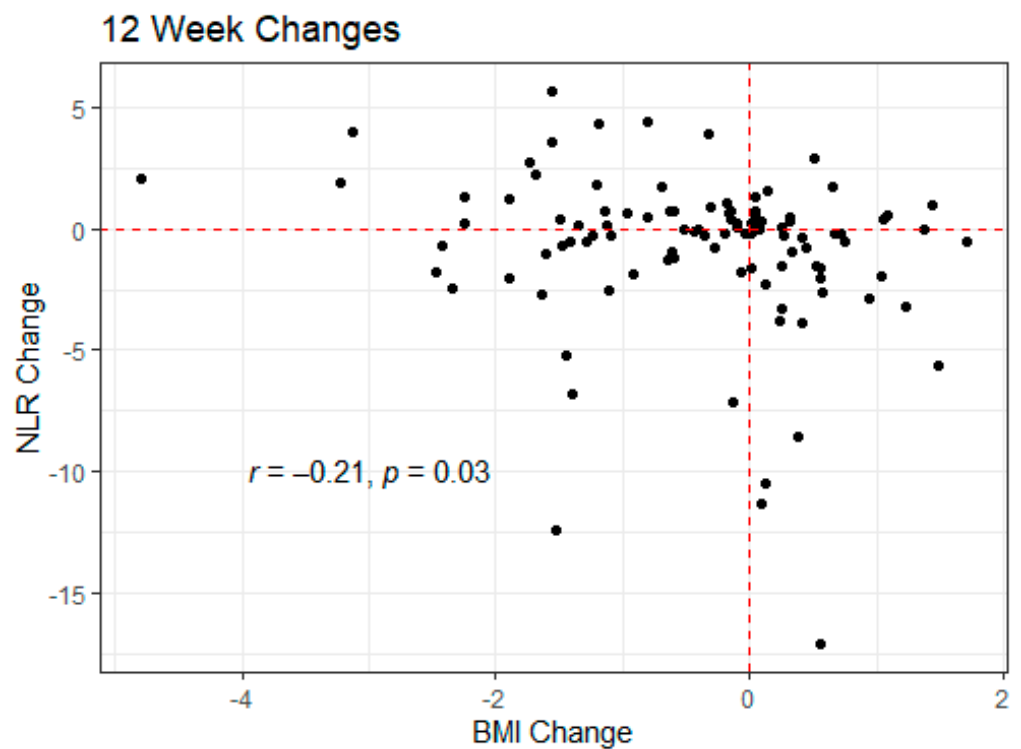

**Figure S3.** Correlation between change in BMI and change in NLR between treatment initiation and 12 weeks of therapy.

**Table S1.** Progression free survival (PFS) and overall survival (OS) for patients with NLR  $\geq 3$  and  $< 3$  at therapy start, 6 weeks and 12 weeks after beginning treatment.

| Outcome | NLR      | Measurement Time               | n  | Median | 95% CI       | p-value |
|---------|----------|--------------------------------|----|--------|--------------|---------|
| OS      | $< 3$    | Treatment Start                | 54 | 61.4   | (49.2, 75.3) | 0.0029  |
| OS      | $\geq 3$ | Treatment Start                | 74 | 39.1   | (26.7, 47.3) |         |
| OS      | $< 3$    | 6 weeks after Treatment Start  | 64 | 57.6   | (43.5, 75.3) | 0.23    |
| OS      | $\geq 3$ | 6 weeks after Treatment Start  | 67 | 46.6   | (35.1, 64.4) |         |
| OS      | $< 3$    | 12 weeks after Treatment Start | 60 | 61.4   | (49.2, 75.3) | 0.0057  |
| OS      | $\geq 3$ | 12 weeks after Treatment Start | 50 | 39.1   | (25.2, 65.1) |         |
| PFS     | $< 3$    | Treatment Start                | 54 | 20     | (15.0, 30.8) | 0.0048  |
| PFS     | $\geq 3$ | Treatment Start                | 74 | 13.1   | (9.9, 16.7)  |         |
| PFS     | $< 3$    | 6 weeks after Treatment Start  | 64 | 16.6   | (14.3, 23.3) | 0.3     |
| PFS     | $\geq 3$ | 6 weeks after Treatment Start  | 67 | 15.3   | (10.3, 18.8) |         |
| PFS     | $< 3$    | 12 weeks after Treatment Start | 60 | 18.4   | (15.0, 24.3) | 0.2     |
| PFS     | $\geq 3$ | 12 weeks after Treatment Start | 50 | 14.5   | (9.8, 17.2)  |         |

**Table S2.** Progression free survival (PFS) and overall survival (OS) for patients with BMI  $\leq 18.5$ ,  $> 18.5$  to  $\leq 25$ ,  $> 25$  to  $\leq 30$  and  $> 30$  at treatment start, 6 weeks after therapy and 12 weeks after therapy and OS at progression for patients with BMI  $\leq 18.5$ ,  $> 18.5$  to  $\leq 25$ ,  $> 25$  to  $\leq 30$  and  $> 30$ .

| Outcome | BMI                   | Measurement Time               | N  | Median | 95% CI       | p-value |
|---------|-----------------------|--------------------------------|----|--------|--------------|---------|
| OS      | $\leq 18.5$           | Treatment start                | 2  | 26.1   | (13.2, N/A)  | 0.082   |
| OS      | $> 18.5$ to $\leq 25$ | Treatment start                | 62 | 44.2   | (27.9, N/A)  |         |
| OS      | $> 25$ to $\leq 30$   | Treatment start                | 44 | 49.2   | (41.4, 65.1) |         |
| OS      | $> 30$                | Treatment start                | 28 | 73.8   | (34.2, N/A)  |         |
| OS      | $\leq 18.5$           | 6 weeks after treatment start  | 4  | 43.0   | (39.1, N/A)  | 0.27    |
| OS      | $> 18.5$ to $\leq 25$ | 6 weeks after treatment start  | 61 | 39.6   | (26.7, 61.4) |         |
| OS      | $> 25$ to $\leq 30$   | 6 weeks after treatment start  | 41 | 51.9   | (39.6, 70.2) |         |
| OS      | $> 30$                | 6 weeks after treatment start  | 23 | 73.8   | (23.3, N/A)  |         |
| OS      | $\leq 18.5$           | 12 weeks after treatment start | 4  | 39.1   | (39.1, N/A)  | 0.41    |
| OS      | $> 18.5$ to $\leq 25$ | 12 weeks after treatment start | 51 | 43.0   | (25.2, 61.4) |         |
| OS      | $> 25$ to $\leq 30$   | 12 weeks after treatment start | 40 | 51.9   | (39.6, 70.2) |         |
| OS      | $> 30$                | 12 weeks after treatment start | 21 | 73.8   | (23.3, N/A)  |         |
| PFS     | $\leq 18.5$           | Treatment start                | 2  | 13.6   | (10.3, N/A)  | 0.76    |
| PFS     | $> 18.5$ to $\leq 25$ | Treatment start                | 62 | 14.5   | (10.5, 17.4) |         |
| PFS     | $> 25$ to $\leq 30$   | Treatment start                | 44 | 16.5   | (11.1, 20.9) |         |
| PFS     | $> 30$                | Treatment start                | 28 | 18.4   | (13.3, 21.5) |         |
| PFS     | $\leq 18.5$           | 6 weeks after treatment start  | 4  | 17.0   | (15.0, N/A)  | 0.73    |
| PFS     | $> 18.5$ to $\leq 25$ | 6 weeks after treatment start  | 61 | 14.0   | (9.9, 19.3)  |         |
| PFS     | $> 25$ to $\leq 30$   | 6 weeks after treatment start  | 41 | 17.5   | (14.0, 30.2) |         |
| PFS     | $> 30$                | 6 weeks after treatment start  | 23 | 15.5   | (11.3, 19.0) |         |
| PFS     | $\leq 18.5$           | 12 weeks after treatment start | 4  | 17.2   | (16.9, N/A)  | 0.36    |
| PFS     | $> 18.5$ to $\leq 25$ | 12 weeks after treatment start | 51 | 14.5   | (10.3, 21.0) |         |
| PFS     | $> 25$ to $\leq 30$   | 12 weeks after treatment start | 40 | 16.7   | (12.0, 25.3) |         |
| PFS     | $> 30$                | 12 weeks after treatment start | 21 | 16.6   | (13.3, 23.3) |         |
| OS      | $\leq 18.5$           | Progression                    | 7  | 22.2   | (1.6, N/A)   | 0.057   |
| OS      | $> 18.5$ to $\leq 25$ | Progression                    | 49 | 17.9   | (12.5, 31.9) |         |
| OS      | $> 25$ to $\leq 30$   | Progression                    | 33 | 33.4   | (18.9, 38.9) |         |
| OS      | $> 30$                | Progression                    | 15 | 63.5   | (4.6, N/A)   |         |

**Table S3.** Change in BMI on OS and PFS.

| <b>Outcome</b>       | <b>Predictor</b>          | <b>Hazard Ratio</b> | <b><i>p</i>-value</b> |
|----------------------|---------------------------|---------------------|-----------------------|
| OS                   | BMI 6-week change         | 0.7813              | 0.107                 |
| OS                   | BMI 12-week change        | 0.8328              | 0.174                 |
| PFS                  | BMI 6-week change         | 0.8949              | 0.331                 |
| PFS                  | BMI 12-week change        | 0.9252              | 0.439                 |
| OS after progression | BMI change at progression | 0.83711             | 0.00336               |

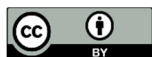

**Copyright:** © 2021 by the authors. Licensee MDPI, Basel, Switzerland. This article is an open access article distributed under the terms and conditions of the Creative Commons Attribution (CC BY) license (<http://creativecommons.org/licenses/by/4.0/>).
